# Supplementary material for: Career self-efficacy disparities in underrepresented biomedical scientist trainees
Source: PubMed Central journal article supplement (PMC9977038; doi:10.1371/journal.pone.0280608), 2023-03-01
Supplement: pone.0280608.s001.pdf [file pone.0280608.s001.pdf]

## **S1. Abbreviations**

ANOVA = Analysis of variance

CIMER = Center for the Improvement of Mentored Experience in Research

IMSD = Initiative for Maximizing Student Development

IRB = institutional review board

IRACDA = Institutional Research and Academic Career Award Program

MARC = Maximizing Access to Research Careers

NIH BEST = National Institutes of Health Broadening Experiences in Scientific Training award

PI = Principal Investigator (research-intensive)

RISE = Research on Improving Systems of Education

SCCT = Social Cognitive Career Theory

STAR = Stipend for Training Aspiring Researchers

STEM = Science Technology Engineering and Math

UR = Underrepresented

WR = Well-Represented

US = United States of America
