# Supplementary material for: Career self-efficacy disparities in underrepresented biomedical scientist trainees
Source: PubMed Central journal article supplement (PMC9977038; doi:10.1371/journal.pone.0280608), 2023-03-01
Supplement: pone.0280608.s002.pdf [file pone.0280608.s002.pdf]

## S2 – Supplemental Table 1. Questionnaire Items

|                                                                                                    |                                                                                                                                                               |
|----------------------------------------------------------------------------------------------------|---------------------------------------------------------------------------------------------------------------------------------------------------------------|
| What year are you in your Ph.D. program?                                                           | 1=1st year<br>2=2nd year<br>3=3rd year<br>4=4th year<br>5=5th year<br>6=6th year or more                                                                      |
| Which of the following best describes your ethnicity? ( <i>optional</i> )                          | 1=Hispanic or Latino<br>2=Not Hispanic or Latino                                                                                                              |
| Q35. Which of the following describes your race? (Please check all that apply) ( <i>optional</i> ) |                                                                                                                                                               |
| a. American Indian or Alaska Native                                                                | 1=Checked<br>0=Not checked                                                                                                                                    |
| b. Asian                                                                                           | 1=Checked<br>0=Not checked                                                                                                                                    |
| c. Black or African American                                                                       | 1=Checked<br>0=Not checked                                                                                                                                    |
| d. Native Hawaiian or other Pacific Islander                                                       | 1=Checked<br>0=Not checked                                                                                                                                    |
| e. White                                                                                           | 1=Checked<br>0=Not checked                                                                                                                                    |
| What is your citizenship status? ( <i>optional</i> )                                               | 1=US citizen since birth<br>2=Naturalized US citizen<br>3=Non-US citizen with permanent resident visa (green card)<br>4=Non-US citizen with temporary US visa |
| What is your gender? ( <i>optional</i> )                                                           | 1=Male<br>2=Female                                                                                                                                            |

|                                                                                                                                                                                       |
|---------------------------------------------------------------------------------------------------------------------------------------------------------------------------------------|
| How confident are you that you can do the following?<br><br>1=Not at all confident<br>2=Minimally confident<br>3=Moderately confident<br>4=Highly confident<br>5=Completely confident |
|---------------------------------------------------------------------------------------------------------------------------------------------------------------------------------------|

- |                                                                                                  |
|--------------------------------------------------------------------------------------------------|
| 1. Assess your abilities to pursue your desired career path(s)                                   |
| 2. Determine the steps to pursue your desired career path(s)                                     |
| 3. Seek advice from professionals in your desired career path(s)                                 |
| 4. Identify potential employers, firms, and institutions relevant to your desired career path(s) |
| 5. Achieve your career goals                                                                     |
| 6. How confident are you to discuss your career goals with your PI/thesis advisor?               |

|                                                                                                                                                                                                                                                                                                    |
|----------------------------------------------------------------------------------------------------------------------------------------------------------------------------------------------------------------------------------------------------------------------------------------------------|
| <p>Q5. Based on the list of career paths, to what extent are you currently considering the following?</p> <p>0=Not familiar enough to decide<br/> 1=Not at all considering<br/> 2=Slightly considering<br/> 3=Moderately considering<br/> 4=Strongly considering<br/> 5=Will definitely pursue</p> |
| a. Principal investigator in a research-intensive institution                                                                                                                                                                                                                                      |
| b. Research in industry                                                                                                                                                                                                                                                                            |
| c. Research staff in a research-intensive institution                                                                                                                                                                                                                                              |
| d. Combined research and teaching careers                                                                                                                                                                                                                                                          |
| e. Teaching-intensive careers in academia                                                                                                                                                                                                                                                          |
| f. Science education for K-12 schools                                                                                                                                                                                                                                                              |
| g. Science education for non-scientists                                                                                                                                                                                                                                                            |
| h. Clinical practice                                                                                                                                                                                                                                                                               |
| i. Public health related careers                                                                                                                                                                                                                                                                   |
| j. Scientific/medical testing                                                                                                                                                                                                                                                                      |
| k. Science writing                                                                                                                                                                                                                                                                                 |
| l. Research administration                                                                                                                                                                                                                                                                         |
| m. Science policy                                                                                                                                                                                                                                                                                  |
| n. Intellectual property                                                                                                                                                                                                                                                                           |
| o. Business of science                                                                                                                                                                                                                                                                             |
| p. Entrepreneurship                                                                                                                                                                                                                                                                                |
| q. Sales and marketing of science-related products                                                                                                                                                                                                                                                 |
| r. Support of science-related products                                                                                                                                                                                                                                                             |
| s. Drug/device approval and production                                                                                                                                                                                                                                                             |
| t. Clinical research management                                                                                                                                                                                                                                                                    |
| u. Career that is not related to science (please specify): _____                                                                                                                                                                                                                                   |
