# Supplementary material for: Career self-efficacy disparities in underrepresented biomedical scientist trainees
Source: PubMed Central journal article supplement (PMC9977038; doi:10.1371/journal.pone.0280608), 2023-03-01
Supplement: pone.0280608.s003.pdf [file pone.0280608.s003.pdf]

**S3 - Supplemental Table 2.** Inter-reliability of Items ( $\alpha = 0.86$ )

| <b>Deleted Variable</b>                              | <b>Item Correlation with Total</b> | <b>Alpha</b> |
|------------------------------------------------------|------------------------------------|--------------|
| Item 1. Self-Assess abilities to pursue desired...   | 0.72                               | 0.83         |
| Item 2. Determine the steps to pursue desired...     | 0.73                               | 0.83         |
| Item 3. Seek advice from professionals in desired... | 0.66                               | 0.84         |
| Item 4. Identify potential employers/institution...  | 0.67                               | 0.84         |
| Item 5. Achieve career goals                         | 0.65                               | 0.85         |
