# Supplementary material for: Career self-efficacy disparities in underrepresented biomedical scientist trainees
Source: PubMed Central journal article supplement (PMC9977038; doi:10.1371/journal.pone.0280608), 2023-03-01
Supplement: pone.0280608.s005.pdf [file pone.0280608.s005.pdf]

**S5. Supplemental Table 3.** Tukey’s corrected multiple comparisons for Gender, Race/Ethnicity, Career Interest, and Seniority

| Tukey's multiple comparisons test                   | Mean Diff. | 95% CI of diff. | Sig  | Adj P-Value |
|-----------------------------------------------------|------------|-----------------|------|-------------|
| Male WR Non-PI Junior vs. Male WR PI Junior         | -0.29      | -0.43 to -0.15  | **** | <0.0001     |
| Male WR Non-PI Junior vs. Male WR PI Senior         | -0.22      | -0.37 to -0.06  | ***  | 0.0002      |
| Male WR Non-PI Junior vs. Male UR PI Junior         | -0.38      | -0.63 to -0.12  | **** | <0.0001     |
| Male WR Non-PI Junior vs. Male UR PI Senior         | -0.37      | -0.70 to -0.04  | *    | 0.0101      |
| Male WR Non-PI Junior vs. Female WR PI Junior       | -0.21      | -0.35 to -0.07  | **** | <0.0001     |
| Male WR Non-PI Junior vs. Female WR PI Senior       | -0.24      | -0.39 to -0.08  | **** | <0.0001     |
| Male WR Non-PI Junior vs. Female UR PI Junior       | -0.27      | -0.51 to -0.02  | *    | 0.0185      |
| Male WR Non-PI Senior vs. Male WR PI Junior         | -0.33      | -0.47 to -0.18  | **** | <0.0001     |
| Male WR Non-PI Senior vs. Male WR PI Senior         | -0.26      | -0.42 to -0.10  | **** | <0.0001     |
| Male WR Non-PI Senior vs. Male UR PI Junior         | -0.41      | -0.68 to -0.15  | **** | <0.0001     |
| Male WR Non-PI Senior vs. Male UR PI Senior         | -0.41      | -0.74 to -0.08  | **   | 0.0022      |
| Male WR Non-PI Senior vs. Female WR PI Junior       | -0.25      | -0.39 to -0.10  | **** | <0.0001     |
| Male WR Non-PI Senior vs. Female WR PI Senior       | -0.27      | -0.43 to -0.11  | **** | <0.0001     |
| Male WR Non-PI Senior vs. Female UR PI Junior       | -0.30      | -0.55 to -0.06  | **   | 0.0027      |
| Male WR PI Junior vs. Female WR Non-PI Junior       | 0.36       | 0.24 to 0.49    | **** | <0.0001     |
| Male WR PI Junior vs. Female WR Non-PI Senior       | 0.34       | 0.21 to 0.47    | **** | <0.0001     |
| Male WR PI Junior vs. Female UR Non-PI Junior       | 0.46       | 0.26 to 0.66    | **** | <0.0001     |
| Male WR PI Senior vs. Female WR Non-PI Junior       | 0.29       | 0.15 to 0.43    | **** | <0.0001     |
| Male WR PI Senior vs. Female WR Non-PI Senior       | 0.27       | 0.12 to 0.42    | **** | <0.0001     |
| Male WR PI Senior vs. Female UR Non-PI Junior       | 0.39       | 0.18 to 0.60    | **** | <0.0001     |
| Male UR Non-PI Senior vs. Female WR Non-PI Junior   | 0.32       | 0.01 to 0.63    | *    | 0.0395      |
| Male UR Non-PI Senior vs. Female UR Non-PI Junior   | 0.41       | 0.06 to 0.76    | **   | 0.0052      |
| Male UR PI Junior vs. Female WR Non-PI Junior       | 0.45       | 0.20 to 0.70    | **** | <0.0001     |
| Male UR PI Junior vs. Female WR Non-PI Senior       | 0.42       | 0.17 to 0.68    | **** | <0.0001     |
| Male UR PI Junior vs. Female UR Non-PI Junior       | 0.54       | 0.25 to 0.84    | **** | <0.0001     |
| Male UR PI Senior vs. Female WR Non-PI Junior       | 0.45       | 0.13 to 0.77    | ***  | 0.0002      |
| Male UR PI Senior vs. Female WR Non-PI Senior       | 0.42       | 0.10 to 0.75    | ***  | 0.0009      |
| Male UR PI Senior vs. Female UR Non-PI Junior       | 0.54       | 0.18 to 0.90    | **** | <0.0001     |
| Female WR Non-PI Junior vs. Female WR PI Junior     | -0.28      | -0.41 to -0.16  | **** | <0.0001     |
| Female WR Non-PI Junior vs. Female WR PI Senior     | -0.31      | -0.45 to -0.17  | **** | <0.0001     |
| Female WR Non-PI Junior vs. Female UR Non-PI Senior | -0.24      | -0.47 to -0.01  | *    | 0.0245      |
| Female WR Non-PI Junior vs. Female UR PI Junior     | -0.34      | -0.58 to -0.10  | **** | <0.0001     |
| Female WR Non-PI Junior vs. Female UR PI Senior     | -0.30      | -0.60 to -0.00  | *    | 0.043       |

|                                                     |       |                |      |         |
|-----------------------------------------------------|-------|----------------|------|---------|
| Female WR Non-PI Senior vs. Female WR PI Junior     | -0.26 | -0.39 to -0.13 | **** | <0.0001 |
| Female WR Non-PI Senior vs. Female WR PI Senior     | -0.29 | -0.43 to -0.14 | **** | <0.0001 |
| Female WR Non-PI Senior vs. Female UR PI Junior     | -0.32 | -0.56 to -0.08 | ***  | 0.0006  |
| Female WR PI Junior vs. Female UR Non-PI Junior     | 0.37  | 0.18 to 0.57   | **** | <0.0001 |
| Female WR PI Senior vs. Female UR Non-PI Junior     | 0.40  | 0.19 to 0.61   | **** | <0.0001 |
| Female UR Non-PI Junior vs. Female UR Non-PI Senior | -0.34 | -0.61 to -0.06 | **   | 0.0031  |
| Female UR Non-PI Junior vs. Female UR PI Junior     | -0.43 | -0.72 to -0.15 | **** | <0.0001 |
| Female UR Non-PI Junior vs. Female UR PI Senior     | -0.39 | -0.73 to -0.06 | **   | 0.0055  |

**Supplemental Table 2 Legend.** Tukey's adjusted multiple comparisons for Gender, Race/Ethnicity, Career Interest, and Seniority. P-values indicate significance analyzed by Tukey's multiple comparisons tests, \*\*\*\*p<0.0001, \*\*\*p<0.001, \*\*p<0.01, and \*p<0.05.
